# Supplementary material for: Elevated CELSR3 expression is associated with hepatocarcinogenesis and poor prognosis
Source: PubMed Central journal article supplement — Oncol Lett. 2020 May 22;20(2):1083–92. doi: 10.3892/ol.2020.11671 (PMC7377182; doi:10.3892/ol.2020.11671), 2020-05-22

Figure S1. Relative CELSR3 expression in HBV/HCV-infected and uninfected hepatocellular carcinoma samples from The Cancer Genome Atlas database. CELSR3, cadherin EGF LAG seven-pass G-type receptor 3; HBV, hepatitis B virus; HCV, hepatitis C virus.

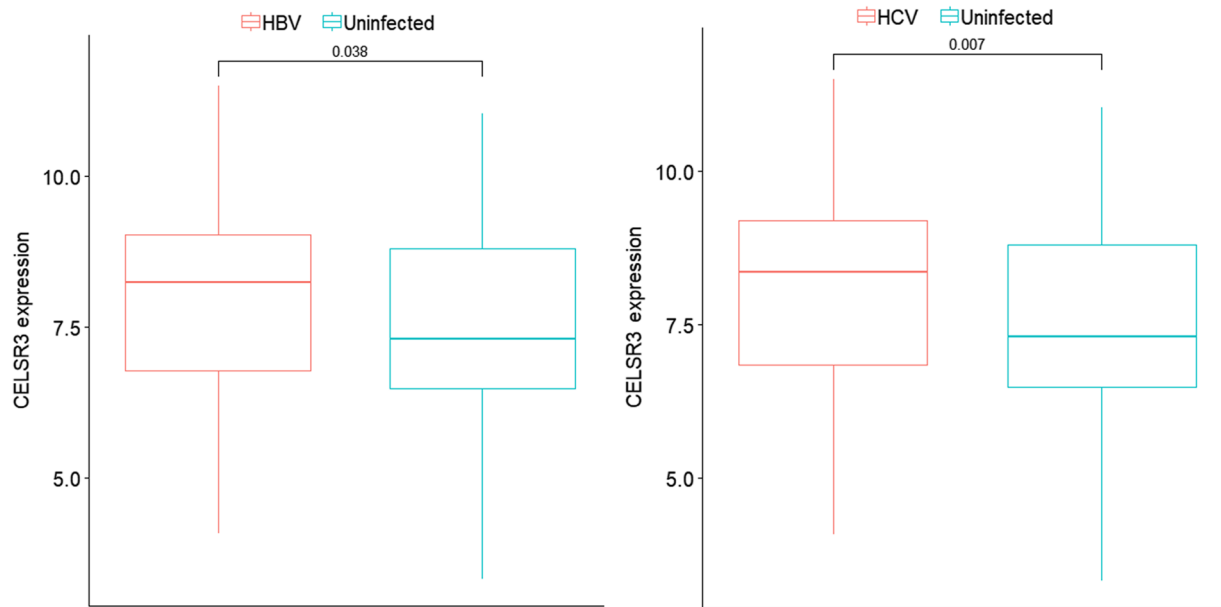

Supplement: Supplementary_Data.pdf [file Supplementary_Data.pdf]
